# Supplementary material for: An Archaea-specific c-type cytochrome maturation machinery is crucial for methanogenesis in Methanosarcina acetivorans
Source: eLife journal article supplement (doi:10.7554/elife.76970), 2022-04-05
Supplement: fig1-data1 [file elife-76970-fig1-data1-v2.pdf]

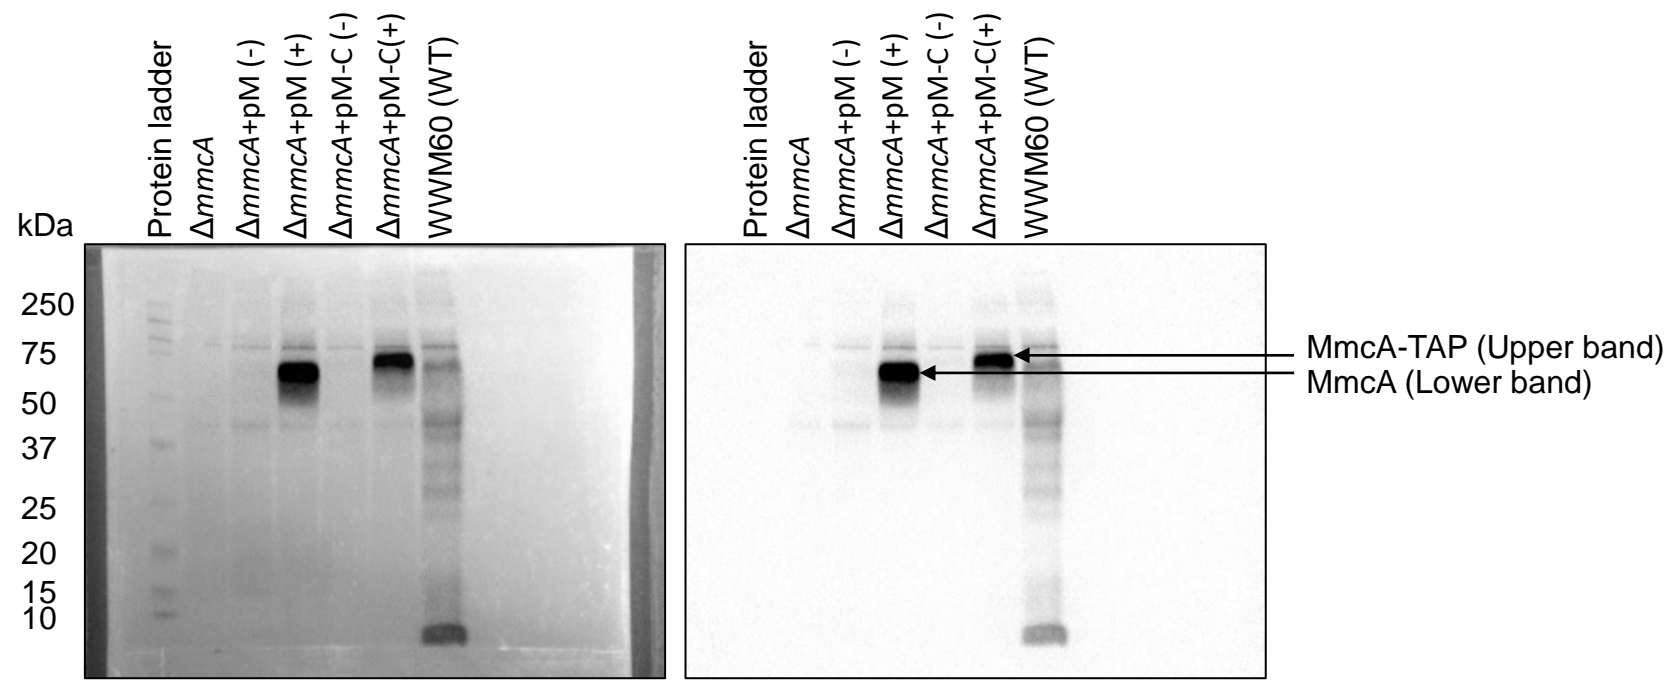

**Figure 1b:** Heme stain, Left hand side (image merged with ladder), Right hand side (image used in figure 1b). For further details, refer to figure legend for Figure 1b.

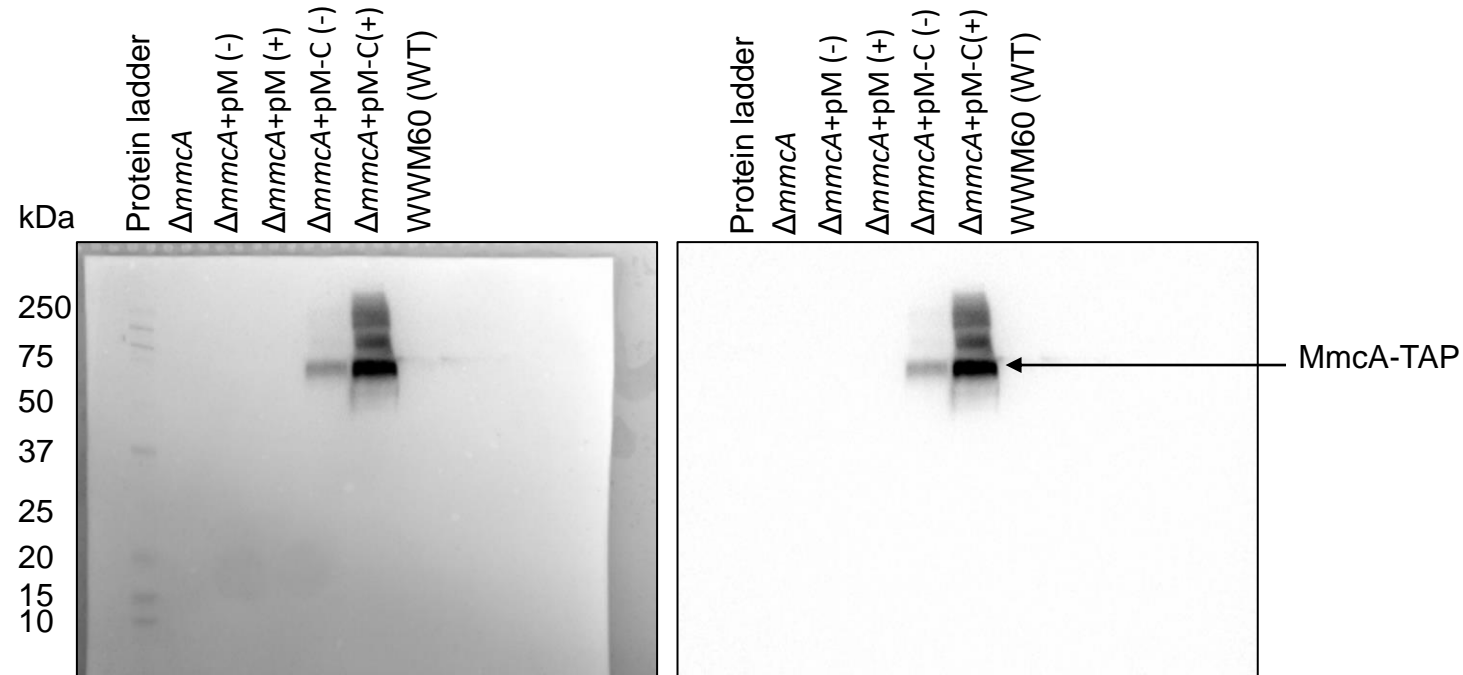

**Figure 1b:** anti-Flag Western Blot, Left hand side (image merged with ladder), Right hand side (image used in figure 1b). For further details, refer to figure legend for Figure 1b.
