# Supplementary material for: An Archaea-specific c-type cytochrome maturation machinery is crucial for methanogenesis in Methanosarcina acetivorans
Source: eLife journal article supplement (doi:10.7554/elife.76970), 2022-04-05
Supplement: fig3-data1 [file elife-76970-fig3-data1-v2.pdf]

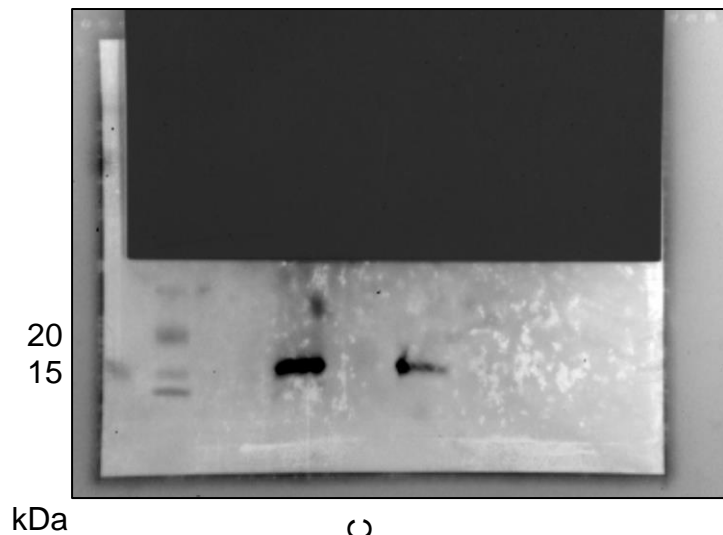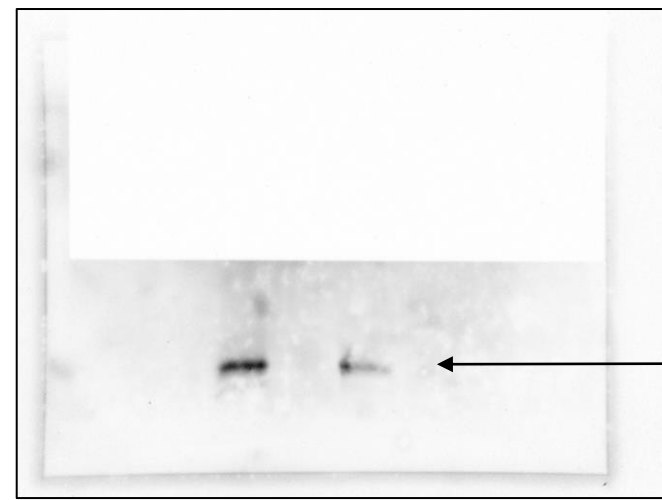

**Figure 3d:** Heme stain, Left hand side (image merged with ladder), Right hand side (image used in figure 3d). For details, refer to the legend for Figure 3d.

CcmE (CcmE-mTAP)

kDa  
20  
15  
Protein ladder  
Empty lane  
Empty lane  
WT + pE-C  
 $\Delta$ ccmABC + pE-C  
 $\Delta$ ccmE + pE-C

Protein ladder  
Empty lane  
Empty lane  
WT + pE-C  
 $\Delta$ ccmABC + pE-C  
 $\Delta$ ccmE + pE-C

Note: The labels are the same for gels and blots on the top and bottom

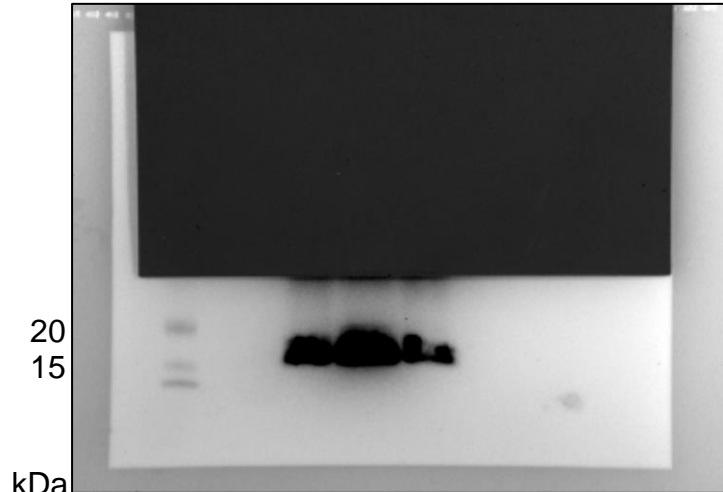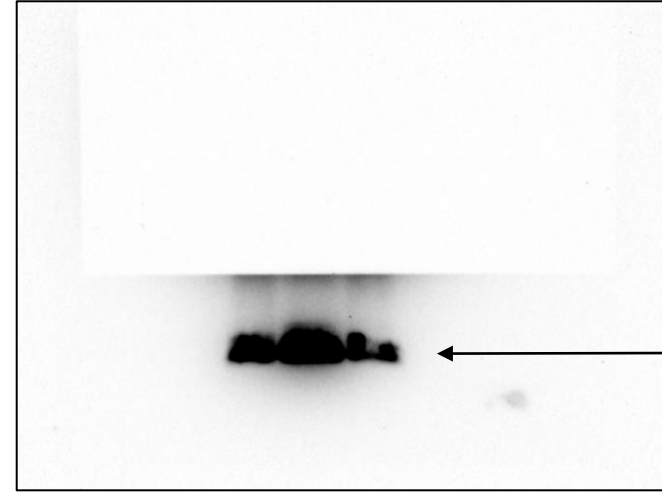

**Figure 3d:** anti-Flag Western Blot, Left hand side (image merged with ladder), Right hand side (image used in figure 3d). For details, refer to the legend for Figure 3d.

CcmE (CcmE-mTAP)

kDa  
20  
15
