# Supplementary material for: An Archaea-specific c-type cytochrome maturation machinery is crucial for methanogenesis in Methanosarcina acetivorans
Source: eLife journal article supplement (doi:10.7554/elife.76970), 2022-04-05
Supplement: fig3-figsupp1-data1 [file elife-76970-fig3-figsupp1-data1-v2.pdf]

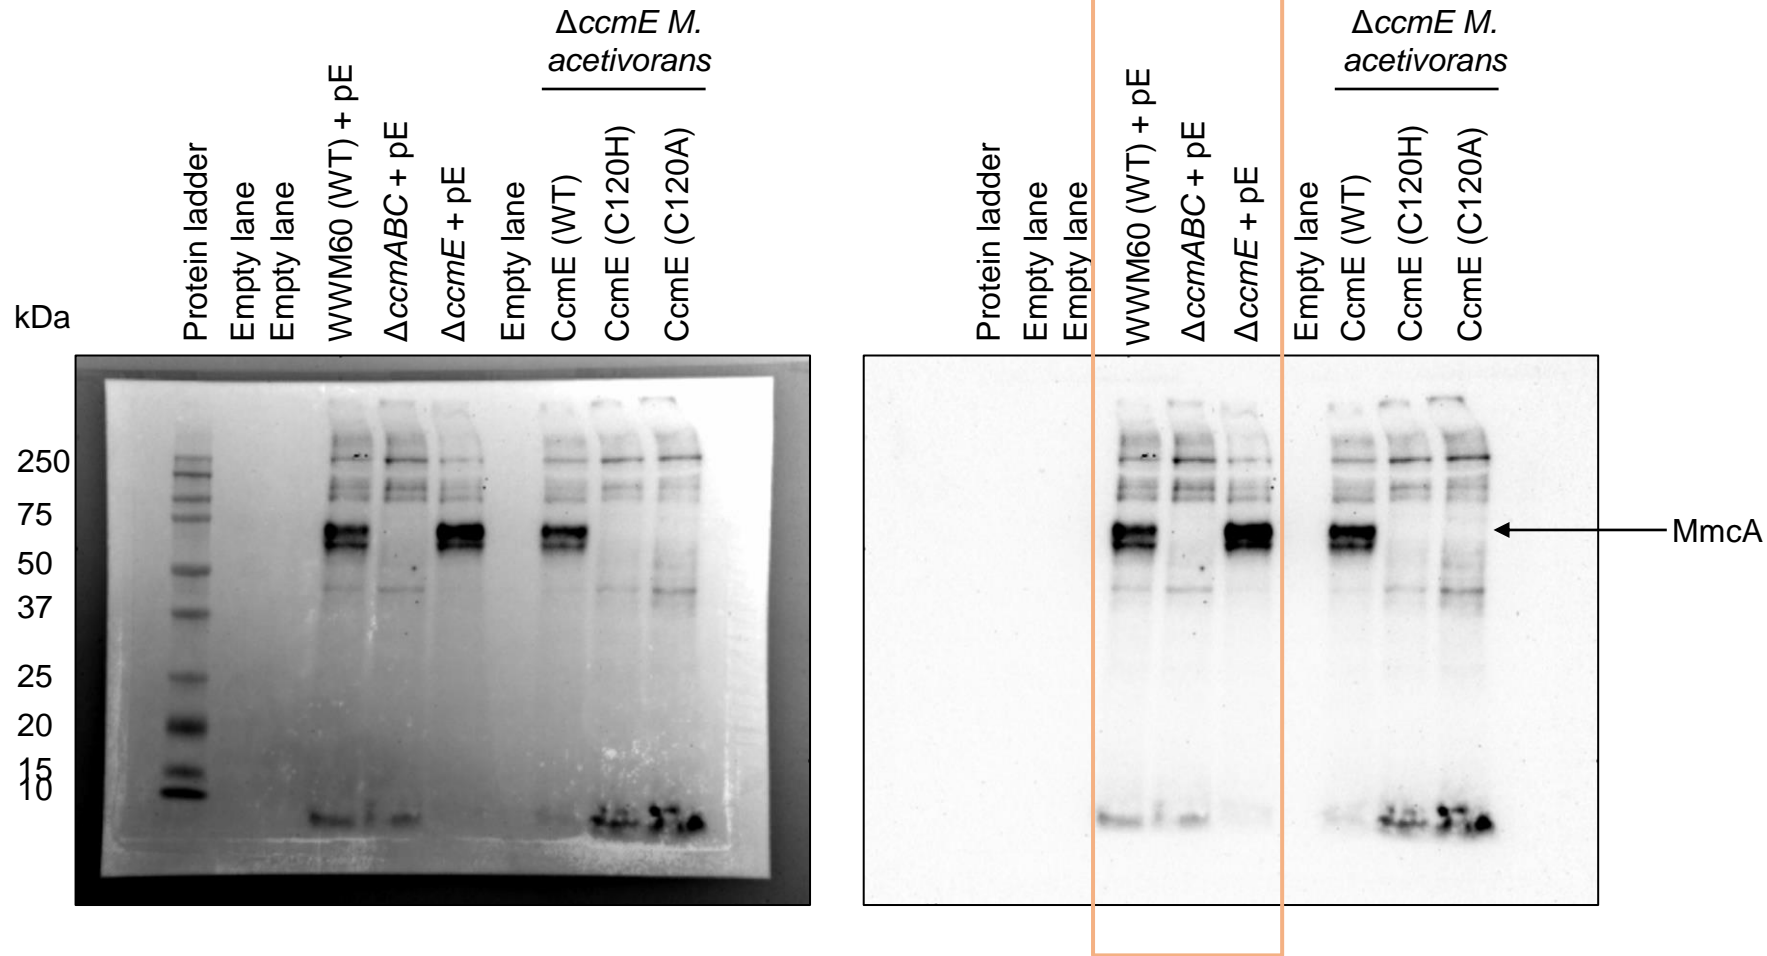

**Figure 3-figure supplement 1-source data 1:** Heme stain, Left hand side (image merged with ladder), Right hand side (image used for Figure 3-figure supplement 1 and Figure 4-figure supplement 2). Lanes in **orange box** were used in Figure 3-figure supplement 1. For detail, refer to the figure legend for Figure 3-figure supplement 1.
