# Supplementary material for: An Archaea-specific c-type cytochrome maturation machinery is crucial for methanogenesis in Methanosarcina acetivorans
Source: eLife journal article supplement (doi:10.7554/elife.76970), 2022-04-05
Supplement: fig4-data1 [file elife-76970-fig4-data1-v2.pdf]

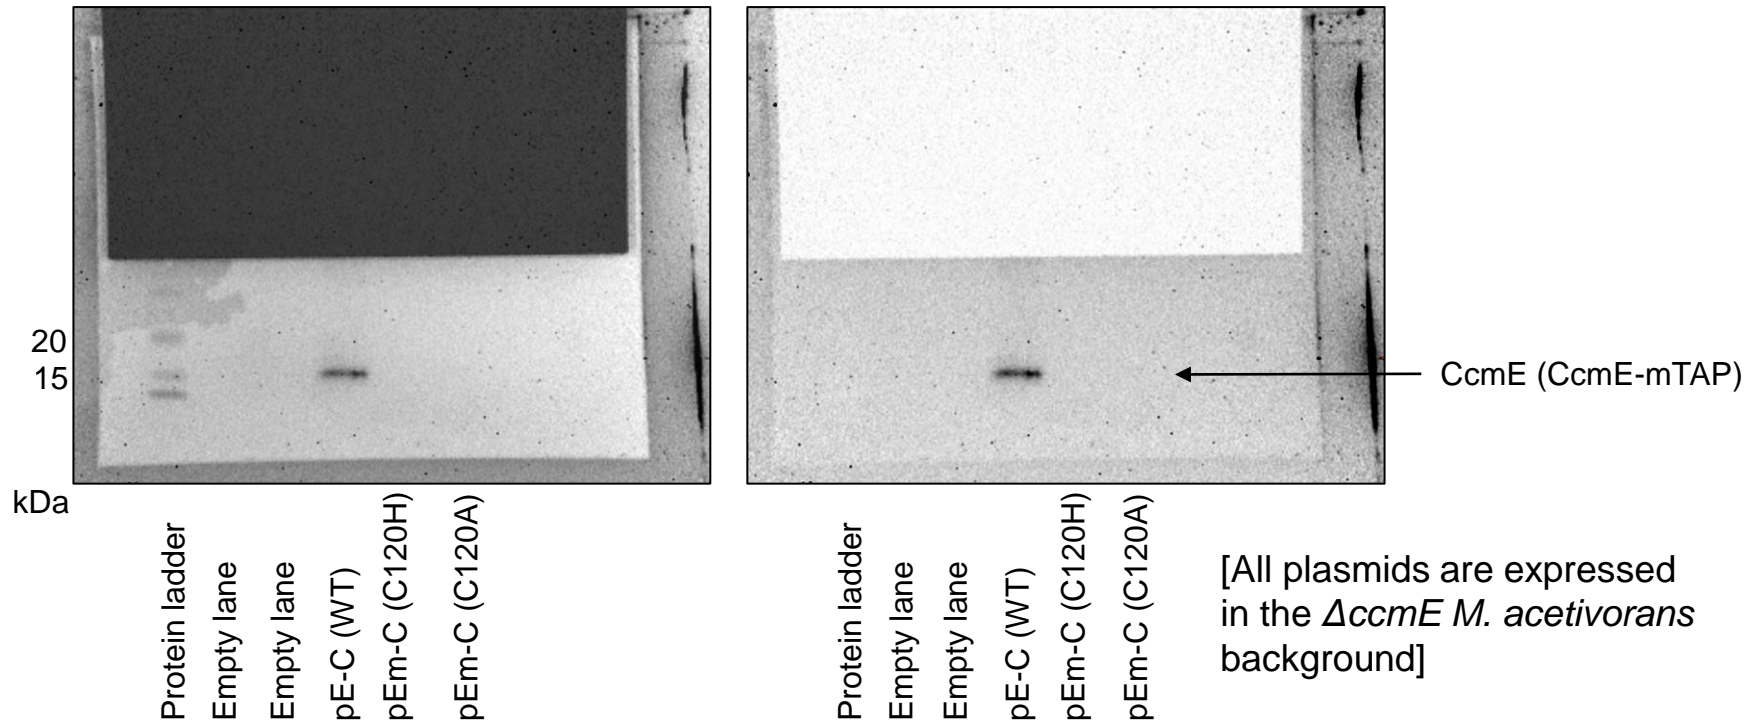

**Figure 4c:** Heme stain, Left hand side (image merged with ladder), Right hand side (image used in figure 4c). For details, refer to the legend for Figure 4c.

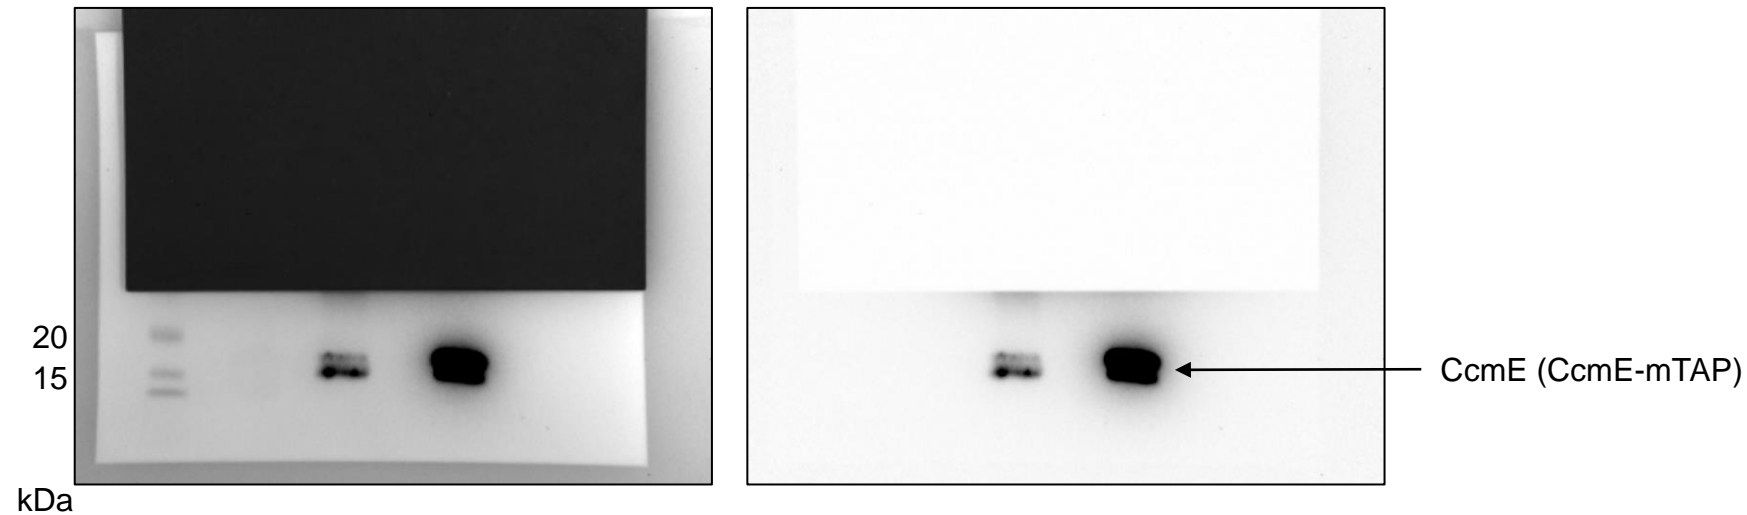

**Figure 4c:** anti-Flag Western Blot, Left hand side (image merged with ladder), Right hand side (image used in figure 4c). For details, refer to the legend for Figure 4c.

Note: The labels are the same for gels and blots on the top and bottom
