# Supplementary material for: An Archaea-specific c-type cytochrome maturation machinery is crucial for methanogenesis in Methanosarcina acetivorans
Source: eLife journal article supplement (doi:10.7554/elife.76970), 2022-04-05
Supplement: fig4-figsupp1-data1 [file elife-76970-fig4-figsupp1-data1-v2.pdf]

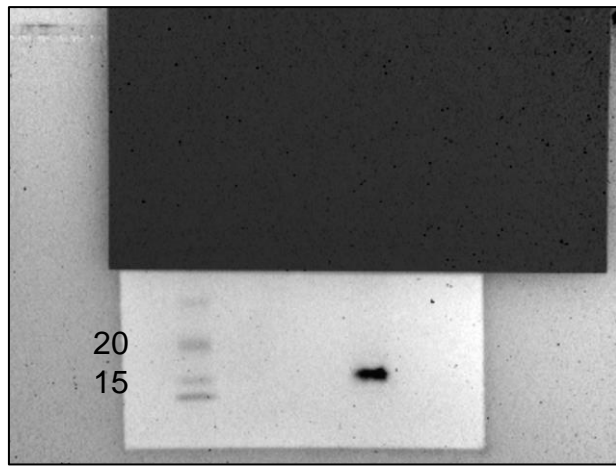

kDa

Protein ladder  
 Empty lane  
 pEm-C (C120H)\_Membrane  
 pEm-C (C120H)\_Soluble  
 pE-C (WT)\_Soluble

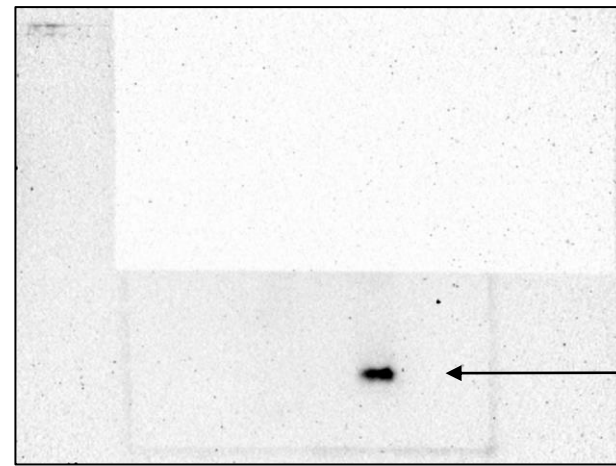

CcmE (CcmE-mTAP)

Protein ladder  
 Empty lane  
 pEm-C (C120H)\_Membrane  
 pEm-C (C120H)\_Soluble  
 pE-C (WT)\_Soluble

[All plasmids are expressed in the *ΔccmE M. acetivorans* background]

Note: The labels are the same for gels and blots on the top and bottom

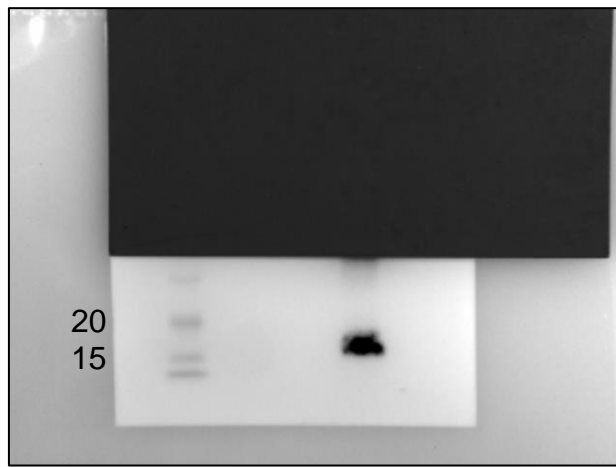

kDa

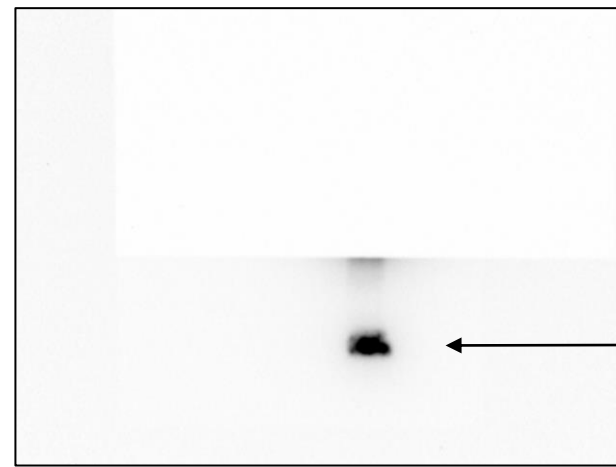

CcmE (CcmE-mTAP)

**Figure 4-figure supplement 1:** Heme stain, Left hand side (image merged with ladder), Right hand side (image used in supplementary figure 5 ). For details, refer to the legend for supplementary figure 5 in the supplementary material.

**Figure 4-figure supplement 1:** anti-Flag Western Blot, Left hand side (image merged with ladder), Right hand side (image used in supplementary figure 5 ). For details, refer to the legend for supplementary figure 5 in the supplementary material.
