# Supplementary material for: An Archaea-specific c-type cytochrome maturation machinery is crucial for methanogenesis in Methanosarcina acetivorans
Source: eLife journal article supplement (doi:10.7554/elife.76970), 2022-04-05
Supplement: fig5-figsupp1-data1 [file elife-76970-fig5-figsupp1-data1-v2.pdf]

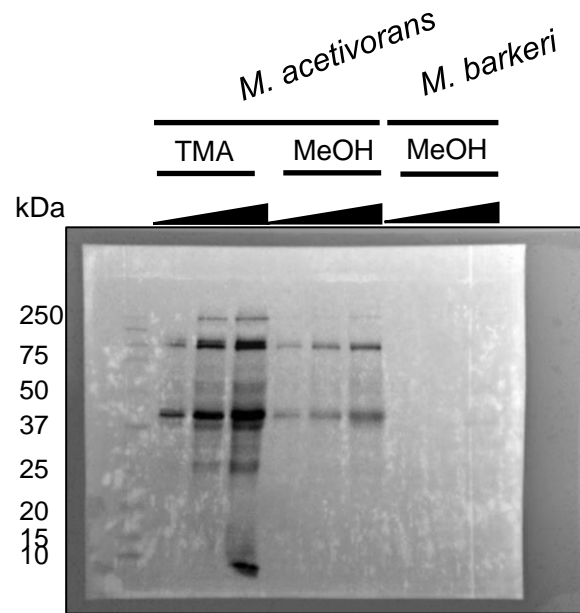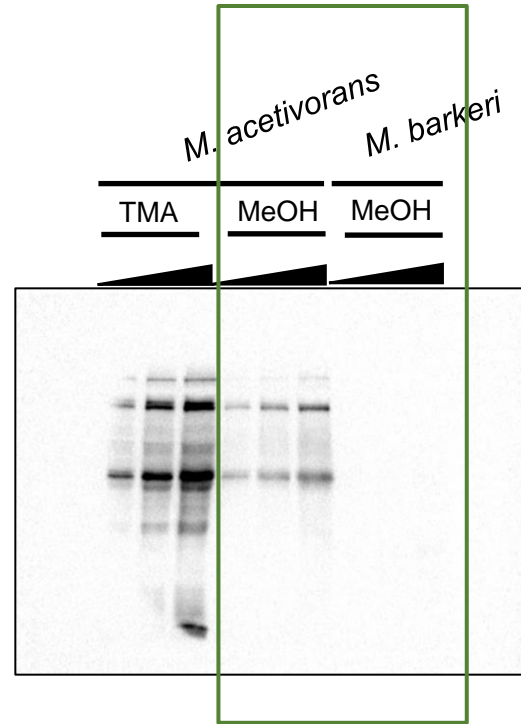

**Figure 5-figure supplement 1:** Heme stain, Left hand side (image merged with ladder), Right hand side (image used in Figure 5-figure supplement 1). Only the result comparing *M. acetivorans* and *M. barkeri* grown in methanol (MeOH) was included (shown here in green box) in Figure 5-figure supplement 1. For details, refer to the figure legend for Figure 5-figure supplement 1.

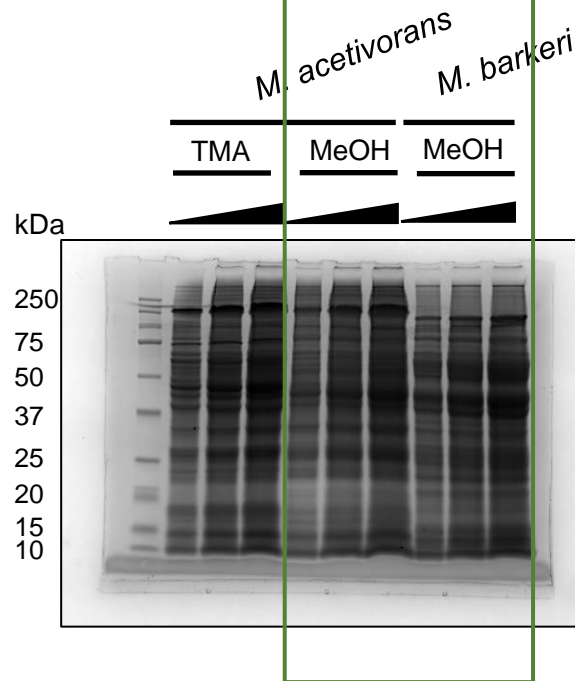

**Figure 5-figure supplement 1 :** Coomassie gels for Heme stains shown above. Only the result comparing *M. acetivorans* and *M. barkeri* grown in methanol (MeOH) was included (shown here in green box) in Figure 5-figure supplement 1. For details, please refer to the figure legend for Figure 5-figure supplement 1.
